# Supplementary material for: Increased serum resistin but not G-CSF levels are associated in the pathophysiology of major depressive disorder: Findings from a case-control study
Source: PLoS One. 2022 Feb 25;17(2):e0264404. doi: 10.1371/journal.pone.0264404 (PMC8880862; doi:10.1371/journal.pone.0264404)
Supplement: S1 File — (XLSX) [file pone.0264404.s001.xlsx]

## Sheet: Minimal data set
Age in years	Sex	BMI (kg/m2)	Serum G-CSF (pg/mL)	Serum Resistin (ng/mL)	Group
21	Male	15.9585	279.454	7.89465	Control
36	Female	17.4953	111.596	2.14465	Control
28	Male	18.1012	168.739	7.14465	Control
28	Female	18.1451	15.1679	3.89465	Control
25	Female	18.5139	11.5964	0.89465	Control
25	Female	18.7291	40.1679	9.89465	Control
28	Female	18.7449	22.3107	2.89465	Control
21	Male	19.1592	18.7393	2.14465	Control
25	Male	19.3548	75.8821	21.3947	Control
35	Female	19.375	18.7393	2.39465	Control
22	Male	19.9168	11.5964	9.64465	Control
18	Female	20.1989	97.3107	2.14465	Control
30	Female	20.2361	4.45357	2.64465	Control
33	Female	20.6666	18.7393	9.64465	Control
52	Male	20.7828	36.5964	7.89465	Control
26	Female	20.9677	47.3107	9.64465	Control
26	Female	20.9677	47.3107	0.89465	Control
27	Female	20.9678	18.7393	2.433	Control
38	Male	21.0884	104.454	0.14465	Control
28	Male	21.1615	22.3107	0.14465	Control
33	Male	21.2781	15.1679	1.39465	Control
32	Female	21.3499	179.454	11.6447	Control
22	Male	22.0615	43.7393	8.64465	Control
37	Female	22.0774	83.025	0.64465	Control
28	Male	22.0984	25.8821	4.14465	Control
32	Female	22.1774	15.1679	7.89465	Control
31	Male	22.3266	61.2393	0.39465	Control
45	Female	22.3889	22.3107	5.39465	Control
40	Male	22.4437	11.5964	3.89465	Control
25	Male	22.4437	247.311	1.89465	Control
50	Male	22.4437	118.739	2.39465	Control
25	Female	22.5806	15.1679	14.3947	Control
29	Female	22.5806	18.7393	4.89465	Control
27	Female	22.6505	22.3107	13.6447	Control
29	Female	22.6505	29.4536	1.64465	Control
27	Female	22.705	22.3107	11.6447	Control
29	Female	22.9839	8.025	4.39465	Control
27	Male	23.041	204.454	1.64465	Control
44	Female	23.25	18.7393	9.64465	Control
23	Male	23.4796	68.7393	4.89465	Control
47	Female	23.4796	15.1679	2.39465	Control
28	Female	23.7903	15.1679	20.3946	Control
30	Female	23.8221	22.3107	1.64465	Control
40	Male	23.8249	4.45357	4.89465	Control
27	Female	24.0449	25.8821	3.658	Control
34	Female	24.1111	83.025	4.39465	Control
27	Male	24.1536	25.8821	0.14465	Control
41	Male	24.1935	54.4536	3.64465	Control
38	Male	24.2187	8.025	16.8946	Control
24	Male	24.4171	50.8821	1.14465	Control
29	Male	24.5154	29.4536	1.64465	Control
28	Male	24.5799	8.025	14.8946	Control
33	Female	24.5967	18.7393	7.64465	Control
49	Male	24.5971	65.1679	4.89465	Control
39	Male	24.5971	25.8821	0.14465	Control
21	Male	24.8607	18.7393	0.89465	Control
57	Male	24.9467	29.4536	9.64465	Control
25	Female	24.9722	22.3107	8.39465	Control
46	Female	24.9722	15.1679	14.6447	Control
26	Female	24.9722	54.4536	12.8947	Control
38	Male	24.9897	22.3107	10.8947	Control
48	Female	24.9999	15.1679	1.89465	Control
19	Male	25.1405	343.739	3.64465	Control
33	Male	25.2061	25.8821	8.164	Control
32	Male	25.2132	243.739	14.3947	Control
29	Male	25.3136	29.4536	2.14465	Control
36	Female	25.354	18.7393	3.64465	Control
26	Female	25.3842	83.025	18.6446	Control
37	Female	25.3842	43.7393	11.8947	Control
48	Female	25.3842	25.8821	5.14465	Control
40	Female	25.4027	18.7393	3.64465	Control
28	Female	25.4032	58.025	3.14465	Control
40	Female	25.4099	15.1679	0.14465	Control
27	Female	25.6181	79.4536	3.14465	Control
28	Male	25.6804	29.4536	3.39465	Control
55	Female	25.6804	47.3107	9.39465	Control
26	Male	25.7324	61.5964	16.3946	Control
32	Female	25.826	0.882143	17.3302	Control
21	Female	26.1653	25.8821	8.64465	Control
48	Female	26.2096	22.3107	1.14465	Control
48	Male	26.2097	15.1679	0.14465	Control
28	Male	26.3314	33.025	9.64465	Control
48	Female	26.6944	168.739	5.14465	Control
46	Male	26.6961	8.025	2.64465	Control
46	Female	27.1249	129.454	1.14465	Control
30	Male	27.1518	90.1679	6.39465	Control
43	Male	27.1518	22.3107	9.89465	Control
27	Male	27.246	29.4536	10.8947	Control
19	Male	27.2777	47.3107	0.89465	Control
36	Female	27.4193	36.5964	19.3946	Control
35	Male	27.5204	36.5964	9.64465	Control
46	Female	27.9861	125.882	2.14465	Control
24	Female	27.9862	18.7393	2.39465	Control
18	Female	28.118	8.025	3.64465	Control
30	Male	28.6153	47.3107	5.39465	Control
55	Male	28.6495	36.5964	0.64465	Control
31	Female	28.8472	22.3107	6.39465	Control
37	Female	29.1589	18.7393	2.86375	Control
34	Female	29.2067	18.7393	12.6447	Control
28	Male	29.2894	61.5964	19.8946	Control
27	Male	30.0828	25.8821	5.64465	Control
52	Female	30.0828	25.8821	4.14465	Control
42	Female	30.2734	33.025	2.89465	Control
31	Male	30.4976	18.7393	11.1447	Control
51	Male	31.0302	68.7393	0.64465	Control
27	Female	31.861	229.454	18.6446	Control
45	Female	32.258	43.7393	6.64465	Control
48	Female	32.7222	29.4536	10.6447	Control
34	Female	33.3243	36.5964	1.14465	Control
43	Female	34.1183	25.8821	9.89465	Control
33	Female	35.1473	8.025	2.24465	Control
42	Female	40.9294	29.4536	2.64465	Control
20	Male	17.0288	8.025	3.14465	Patient
40	Female	17.2222	15.1679	1.89465	Patient
38	Female	17.4953	136.596	28.8946	Patient
30	Female	18.3432	22.3107	10.8947	Patient
55	Female	18.5483	8.025	1.64465	Patient
30	Male	18.9209	40.1679	5.89465	Patient
38	Female	18.9209	340.168	18.8946	Patient
45	Female	18.9209	211.596	34.6446	Patient
30	Female	19.375	40.1679	8.89465	Patient
45	Female	19.375	29.4536	7.89465	Patient
25	Male	19.375	183.025	55.1446	Patient
45	Female	19.375	50.8821	40.6446	Patient
23	Female	19.5263	22.3107	6.14465	Patient
36	Female	19.6777	18.7393	2.39465	Patient
19	Male	19.8107	15.1679	22.6446	Patient
21	Female	19.9946	58.025	29.3946	Patient
28	Female	20.1612	154.454	17.6446	Patient
40	Female	20.1775	33.025	1.89465	Patient
26	Male	20.1775	75.8821	20.3946	Patient
35	Male	20.2361	75.8821	32.6446	Patient
30	Male	20.372	86.5964	13.3947	Patient
22	Male	20.4345	33.025	4.64465	Patient
28	Male	20.6382	65.1679	15.1446	Patient
48	Female	20.6667	22.3107	3.64465	Patient
23	Male	20.6979	47.3107	18.1446	Patient
52	Male	20.7828	36.5964	4.64465	Patient
26	Female	20.9678	15.1679	15.8947	Patient
19	Female	21.0885	11.5964	5.14465	Patient
18	Male	21.3498	90.1679	17.6446	Patient
28	Male	21.4078	308.025	2.39465	Patient
23	Male	21.7532	4.45357	2.64465	Patient
29	Female	22.3888	11.5964	13.6447	Patient
28	Female	22.3889	18.7393	8.39465	Patient
24	Male	22.4173	43.7393	12.3947	Patient
22	Male	22.4437	25.8821	10.1447	Patient
34	Male	22.5806	186.596	64.1446	Patient
31	Male	22.6505	40.1679	4.64465	Patient
22	Female	22.705	58.025	16.8946	Patient
27	Male	22.7942	72.3107	13.3038	Patient
36	Female	23.038	33.025	14.8946	Patient
23	Female	23.041	15.1679	32.6446	Patient
38	Male	23.1124	133.025	12.3947	Patient
38	Female	23.129	15.1679	0.14465	Patient
22	Male	23.4645	90.1679	21.6447	Patient
24	Female	23.6806	0.882143	11.1447	Patient
30	Male	23.7904	18.7393	1.14465	Patient
37	Male	23.825	22.3107	6.39465	Patient
19	Male	23.8403	190.168	8.89465	Patient
27	Male	23.8461	8.025	5.39465	Patient
36	Female	24.1602	15.1679	14.8946	Patient
25	Male	24.1702	0.882143	2.39465	Patient
22	Male	24.1965	68.7393	7.89465	Patient
30	Male	24.2188	83.025	25.8947	Patient
35	Female	24.4901	11.5964	11.1447	Patient
38	Female	24.5799	61.5964	7.64465	Patient
30	Male	24.5971	11.5964	5.14465	Patient
38	Female	24.5971	18.7393	4.14465	Patient
39	Male	24.5971	97.3107	15.3947	Patient
25	Male	24.9081	18.7393	4.39465	Patient
35	Male	24.9467	18.7393	14.3947	Patient
20	Female	24.9723	4.45357	3.14465	Patient
38	Male	24.9898	18.7393	33.8946	Patient
40	Female	24.9932	8.025	3.89465	Patient
29	Female	24.9999	25.8821	29.8947	Patient
23	Female	24.9999	86.5964	11.6447	Patient
36	Male	25.264	179.454	14.8946	Patient
18	Female	25.8026	29.4536	19.3946	Patient
22	Female	25.8333	58.025	0.64465	Patient
25	Female	25.8333	315.168	41.1446	Patient
34	Male	25.8966	450.882	47.8946	Patient
24	Male	26.1461	25.8821	12.1447	Patient
56	Female	26.4892	11.5964	10.1447	Patient
43	Male	26.5558	25.8821	13.1447	Patient
36	Female	26.6945	18.7393	1.89465	Patient
25	Male	27.0431	97.3107	27.6446	Patient
40	Male	27.1518	72.3107	23.8946	Patient
35	Female	27.4193	33.025	9.89465	Patient
36	Female	27.4193	36.5964	0.89465	Patient
28	Male	27.4194	50.8821	1.39465	Patient
32	Male	27.487	65.1679	0.14465	Patient
20	Male	27.7549	15.1679	11.6447	Patient
35	Female	27.9861	61.5964	39.1446	Patient
18	Female	27.9861	0.882143	0.89465	Patient
57	Female	27.9862	18.7393	8.39465	Patient
22	Male	28.2259	8.025	4.64465	Patient
42	Female	28.4167	29.4536	6.89465	Patient
29	Female	28.6154	22.3107	36.3946	Patient
32	Female	29.4354	25.8821	1.64465	Patient
26	Male	30.0829	29.4536	6.64465	Patient
26	Male	30.3854	11.5964	35.1446	Patient
30	Male	30.724	18.7393	1.14465	Patient
48	Female	31.2415	22.3107	7.64465	Patient
27	Male	31.4088	11.5964	50.3946	Patient
38	Female	31.8548	50.8821	12.6447	Patient
37	Male	31.9489	33.025	5.64465	Patient
33	Female	31.9637	0.882143	10.8947	Patient
37	Male	32.0249	15.1679	7.64465	Patient
50	Female	32.2532	4.45357	2.64465	Patient
32	Male	32.2581	4.45357	4.14465	Patient
39	Female	32.7141	22.3107	4.89465	Patient
48	Female	32.7222	29.4536	6.633	Patient
45	Female	33.3956	22.3107	11.3947	Patient
21	Male	33.804	11.5964	14.1447	Patient
47	Female	33.871	8.025	5.39465	Patient
37	Female	34.014	104.454	8.89465	Patient
35	Female	34.0575	25.8821	19.1446	Patient
33	Male	37.4584	15.1679	11.6447	Patient
38	Female	38.3195	100.882	21.8947	Patient
